# Supplementary material
Source: PubMed Central journal article supplement (PMC2904226)
Supplement: 01090.2009_1.pdf [file 01090.2009_1.pdf]

### **Supplemental Figure Captions**

**Supplemental Figure 1.** Mean horizontal and vertical eye position during the 1s stimulus presentation interval, binned based on the spatial position (left/right) and value (low/high) of the selected stimulus. Data shown separately for each of the four subjects for which eye tracking data were collected during scanning. No significant differences were evident. Error bars  $\pm 1$ S.E.M.

## Horizontal position

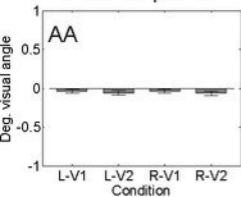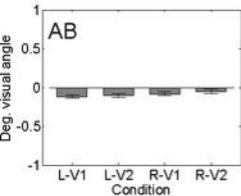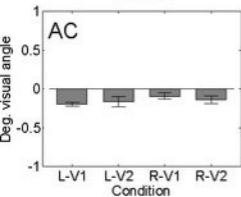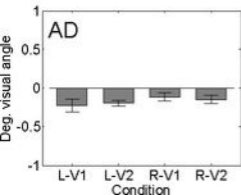

## Vertical position

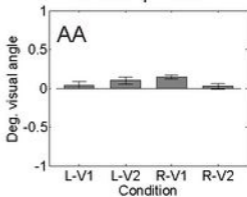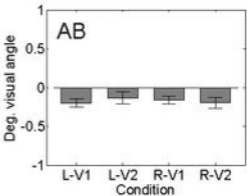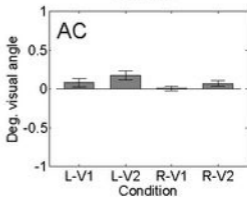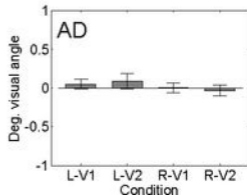

| <b>Subject</b> | <b>Number past rewards</b> | <b>Number of past choices</b> |
|----------------|----------------------------|-------------------------------|
| <b>AA</b>      | 25                         | 4                             |
| <b>AB</b>      | 14                         | 3                             |
| <b>AC</b>      | 6                          | 9                             |
| <b>AD</b>      | 28                         | 7                             |
| <b>AE</b>      | 5                          | 13                            |
| <b>AF</b>      | 4                          | 16                            |
| <b>AG</b>      | 10                         | 15                            |
| <b>AH</b>      | 8                          | 2                             |

1
